# Supplementary material
Source: publisher figshare collection journal article supplement (https://geolsoc.figshare.com/ndownloader/files/24431807)
Supplement: Supplementary file 1 [file 24431807]

**Supplementary material 2**

**Zircon U–Pb LA–ICP–MS methodology**

Samples were crushed and milled to <300 μm and zircons were extracted using conventional magnetic and density separation methods. Inclusion-free zircons were handpicked for U–Pb by laser-ablation inductively coupled plasma mass spectrometry (LA–ICP–MS) analyses. LA–ICP–MS analyses were performed at the Laboratorio de Estudios Isotópicos (LEI), Centro de Geociencias, Universidad Nacional Autónoma de México (Juriquilla, Mexico), using a Resonetics “Resolution M50” 193 nm excimer laser Workstation coupled with a Thermo Xii Series quadrupole mass spectrometer. The analytical procedure is described in Solari *et al.* (2010). Data reduction was performed offline following the procedure reported by Solari & Tanner (2011). Zircon grains with errors >10% and high discordance were disregarded from the weighted mean. Age plots were made using IsoplotR (Vermeesch 2018). All errors are reported at the 2σ-level (unless stated otherwise).

**References**

Solari, L.A., Gómez-Tuena, A., Bernal, J.P., Pérez-Arvizu, O., Tanner, M. 2010. U-Pb zircon geochronology with an Integrated LA-ICP-MS Microanalytical workstation: Achievements in precision and Accuracy. *Geostand. Geoanal. Res.* **34**, 5–18.

Solari, L.A., Tanner, M. 2011. UPb age, a fast data reduction script for LA-ICP-MS UPb geochronology. *Rev. Mex. Cienc. Geol.* **28**, 83–91.

Vermeesch, P. 2018. IsoplotR, https://github.com/pvermees/IsoplotRgui, https://doi.org/10.1016/j.gsf.2018.04.001
